# Supplementary material
Source: publisher figshare collection journal article supplement (https://karger.figshare.com/ndownloader/files/35918486)
Supplement: Supplementary file 1 [file 35918486]

## Supplementary data

**Table S1. Univariate analyses of recurrence-free survival**

|                                                                                             | <b>Hazard ratio (95% CI)</b> | <b>p value</b> |
|---------------------------------------------------------------------------------------------|------------------------------|----------------|
| <b>Univariate analysis</b>                                                                  |                              |                |
| Age (>61 years vs. ≤60 years)                                                               | 0.80 (0.54-1.17)             | 0.245          |
| Sex (male vs. female)                                                                       | 1.08 (0.68-1.71)             | 0.751          |
| Etiology                                                                                    |                              |                |
| HBV vs. non-viral                                                                           | 1.02 (0.58-1.79)             | 0.951          |
| HCV vs. non-viral                                                                           | 1.12 (0.59-2.13)             | 0.720          |
| Grade (grade 3 vs. grade 1, 2)                                                              | 0.78 (0.48-1.26)             | 0.312          |
| AFP (>20 vs. ≤20 ng/ml)                                                                     | 0.97 (0.66-1.42)             | 0.856          |
| AJCC (stage II, III vs. stage I)                                                            | 1.33 (0.90-1.95)             | 0.153          |
| ICOS <sup>+</sup> Foxp3 <sup>+</sup> cell density (high vs. low)*                           | 1.00 (0.68-1.46)             | 0.980          |
| All Foxp3 <sup>+</sup> cell density (high vs. low)*                                         | 0.86 (0.58-1.26)             | 0.435          |
| Ratio of ICOS <sup>+</sup> Foxp3 <sup>+</sup> /all Foxp3 <sup>+</sup> cells (high vs. low)* | 1.33 (0.91-1.96)             | 0.143          |
| ICOS <sup>+</sup> Foxp3 <sup>+</sup> cell density (high vs. low)*                           | 0.81 (0.55-1.19)             | 0.275          |
| All ICOS <sup>+</sup> cell density (high vs. low)*                                          | 1.10 (0.75-1.61)             | 0.620          |
| ICOS <sup>+</sup> Foxp3 <sup>-</sup> cell density (high vs. low)*                           | 1.00 (0.68-1.47)             | 0.989          |
| Distance of ICOS <sup>+</sup> Foxp3 <sup>-</sup> cells to the nearest ICOS <sup>+</sup>     |                              | 0.959          |
| Foxp3 <sup>+</sup> cell (short vs. long)*                                                   | 0.99 (0.68-1.45)             |                |
| CD3 <sup>+</sup> cell density (high vs. low)*                                               | 1.08 (0.73-1.58)             | 0.708          |
| CD8 <sup>+</sup> cell density (high vs. low)*                                               | 0.80 (0.55-1.17)             | 0.249          |
| CD68 <sup>+</sup> cell density (high vs. low)*                                              | 0.87 (0.59-1.27)             | 0.463          |

\*the cutoff level was median

HBV, hepatitis virus B; HCV, hepatitis C virus; AFP, α-fetoprotein.

**Table S2. Univariate and multivariate analyses of overall survival**

|                                                                                             | <b>Hazard ratio (95% CI)</b> | <b>p value</b>   |
|---------------------------------------------------------------------------------------------|------------------------------|------------------|
| <b>Univariate analysis</b>                                                                  |                              |                  |
| Age (>61 years vs. ≤60 years)                                                               | 0.76 (0.48-1.20)             | 0.239            |
| Sex (male vs. female)                                                                       | 1.24 (0.69-2.21)             | 0.476            |
| Etiology                                                                                    |                              |                  |
| HBV vs. non-viral                                                                           | 0.85 (0.45-1.60)             | 0.607            |
| HCV vs. non-viral                                                                           | 0.72 (0.34-1.53)             | 0.400            |
| Grade (grade 3 vs. grade 1, 2)                                                              | 0.99 (0.58-1.70)             | 0.978            |
| AFP (>20 vs. ≤20 ng/ml)                                                                     | 1.58 (1.00-2.50)             | 0.051            |
| AJCC (stage II, III vs. stage I)                                                            | 2.34 (1.48-3.69)             | <b>&lt;0.001</b> |
| ICOS <sup>+</sup> Foxp3 <sup>+</sup> cell density (high vs. low)*                           | 1.48 (0.94-2.34)             | 0.090            |
| All Foxp3 <sup>+</sup> cell density (high vs. low)*                                         | 1.46 (0.92-2.30)             | 0.108            |
| Ratio of ICOS <sup>+</sup> Foxp3 <sup>+</sup> /all Foxp3 <sup>+</sup> cells (high vs. low)* | 1.33 (0.85-2.10)             | 0.213            |
| ICOS <sup>-</sup> Foxp3 <sup>+</sup> cell density (high vs. low)*                           | 1.42 (0.90-2.25)             | 0.130            |
| All ICOS <sup>+</sup> cell density (high vs. low)*                                          | 1.31 (0.83-2.06)             | 0.249            |
| ICOS <sup>+</sup> Foxp3 <sup>-</sup> cell density (high vs. low)*                           | 1.19 (0.76-1.88)             | 0.443            |
| Distance of ICOS <sup>+</sup> Foxp3 <sup>-</sup> cells to the nearest ICOS <sup>+</sup>     |                              | <b>0.032</b>     |
| Foxp3 <sup>+</sup> cell (short vs. long)*                                                   | 1.66 (1.05-2.62)             |                  |
| CD3 <sup>+</sup> cell density (high vs. low)*                                               | 0.71 (0.45-1.12)             | 0.143            |
| CD8 <sup>+</sup> cell density (high vs. low)*                                               | 0.84 (0.54-1.33)             | 0.462            |
| CD68 <sup>+</sup> cell density (high vs. low)*                                              | 0.91 (0.58-1.44)             | 0.700            |
| <b>Multivariate analysis<sup>#</sup></b>                                                    |                              |                  |
| AJCC (stage II, III vs. stage I)                                                            | 2.30 (1.46-3.63)             | <0.001           |
| Distance of ICOS <sup>+</sup> Foxp3 <sup>-</sup> cells to the nearest ICOS <sup>+</sup>     |                              | 0.045            |
| Foxp3 <sup>+</sup> cell (short vs. long)*                                                   | 1.60 (1.01-2.53)             |                  |

\*the cutoff level was median

<sup>#</sup>estimated by cox proportional hazards model

HBV, hepatitis virus B; HCV, hepatitis C virus; AFP, α-fetoprotein.
